# Supplementary material for: Breast Reconstruction Trends in the Setting of Postmastectomy Radiation Therapy: Analysis of Practices among Plastic Surgeons in the United States
Source: PubMed Central journal article supplement — Plast Reconstr Surg Glob Open. 2023 Feb 17;11(2):e4800. doi: 10.1097/GOX.0000000000004800 (PMC9937102; doi:10.1097/gox.0000000000004800), 2023-02-17
Supplement: gox-11-e4800-s002.pdf [file gox-11-e4800-s002.pdf]

Variations in preferred techniques and timing across respondent characteristics

|                                                    | Geography          |                          |                    |                          |              | Surgeon Experience (Years in Practice) |                          |                    |                          |              | Practice Outliers            |                          |                          |                          |                                 |                          |                  |
|----------------------------------------------------|--------------------|--------------------------|--------------------|--------------------------|--------------|----------------------------------------|--------------------------|--------------------|--------------------------|--------------|------------------------------|--------------------------|--------------------------|--------------------------|---------------------------------|--------------------------|------------------|
|                                                    | USA                |                          | Rest of the world  |                          |              | Greater than 5 years                   |                          | First 5 years      |                          |              | Predominantly (≥80%) implant |                          | Balanced practice        |                          | Predominantly (≥40%) autologous |                          |                  |
|                                                    | % Preferred option | % Least preferred option | % Preferred option | % Least preferred option | p-value      | % Preferred option                     | % Least preferred option | % Preferred option | % Least preferred option | p-value      | % Preferred option           | % Least preferred option | % Preferred option       | % Least preferred option | % Preferred option              | % Least preferred option | p-value          |
| Preferred technique in a history of radiation      |                    |                          |                    |                          |              |                                        |                          |                    |                          |              |                              |                          |                          |                          |                                 |                          |                  |
| Implant-based                                      | 25 (12.6%)         | 116 (56.6%)              | 41 (22.4%)         | 89 (43.4%)               | <b>0.006</b> | 62 (19.6%)                             | 165 (52.1%)              | 4 (6.3%)           | 40 (62.5%)               | <b>0.027</b> | 41 (26.3%)                   | 70 (44.9%)               | 18 (15.4%)               | 68 (58.1%)               | 7 (6.5%)                        | 67 (62.0%)               | <b>&lt;0.001</b> |
| Direct autologous                                  | 122 (61.6%)        | 13 (6.6%)                | 105 (57.4%)        | 27 (14.8%)               | 0.069        | 183 (57.7%)                            | 36 (11.4%)               | 44 (68.8%)         | 4 (6.3%)                 | <b>0.039</b> | 65 (41.7%)                   | 24 (15.4%)               | 74 (63.2%)               | 11 (9.4%)                | 88 (81.5%)                      | 5 (4.6%)                 | <b>&lt;0.001</b> |
| Tissue expander to autologous                      | 22 (11.1%)         | 41 (20.7%)               | 22 (12.0%)         | 35 (19.1%)               | 0.965        | 33 (10.4%)                             | 66 (20.8%)               | 11 (17.2%)         | 10 (15.6%)               | 0.372        | 20 (12.8%)                   | 35 (22.4%)               | 12 (10.3%)               | 22 (18.8%)               | 12 (11.1%)                      | 19 (17.6%)               | 0.125            |
| Implant + autologous                               | 29 (14.6%)         | 28 (14.1%)               | 15 (8.2%)          | 31 (17.5%)               | 0.055        | 39 (12.3%)                             | 50 (15.8%)               | 5 (7.8%)           | 10 (15.6%)               | 0.741        | 30 (19.2%)                   | 27 (17.3%)               | 13 (11.1%)               | 116 (13.7%)              | 1 (0.9%)                        | 17 (15.7%)               | <b>&lt;0.001</b> |
| Preferred timing when post-op radiation unknown    | % Preferred Option | % Least Preferred Option | % Preferred Option | % Least Preferred Option | p-value      | % Preferred Option                     | % Least Preferred Option | % Preferred Option | % Least Preferred Option | p-value      | % Preferred Option           | % Least Preferred Option | % Preferred Option       | % Least Preferred Option | % Preferred Option              | % Least Preferred Option | p-value          |
| Immediate                                          | 92 (46.5%)         | 61 (30.8%)               | 72 (39.3%)         | 61 (33.3%)               | 0.347        | 135 (42.6%)                            | 101 (31.9%)              | 29 (45.3%)         | 21 (32.8%)               | 0.820        | 76 (48.7%)                   | 39 (25.0%)               | 42 (35.9%)               | 42 (35.9%)               | 46 (42.6%)                      | 41 (38.0%)               | 0.071            |
| Delayed                                            | 30 (15.2%)         | 85 (42.9%)               | 40 (21.9)          | 82 (44.8%)               | 0.119        | 61 (19.2%)                             | 140 (44.2%)              | 9 (14.1%)          | 27 (42.2%)               | 0.461        | 23 (14.7%)                   | 77 (49.4%)               | 24 (20.5%)               | 51 (43.6%)               | 23 (21.3%)                      | 39 (36.1%)               | 0.250            |
| Delayed-Immediate                                  | 76 (38.4%)         | 52 (26.3%)               | 71 (38.8%)         | 40 (21.9%)               | 0.556        | 121 (38.2%)                            | 76 (24.0%)               | 26 (40.6%)         | 16 (25.0%)               | 0.870        | 57 (36.5%)                   | 40 (25.6%)               | 51 (43.6%)               | 24 (20.5)                | 39 (36.1%)                      | 28 (25.9%)               | 0.715            |
| Preferred technique when post-op radiation unknown | USA                | Rest of the world        | p-value            |                          |              | Greater than 5 years                   | First 5 years            | p-value            |                          |              | Predominantly implant        | Balanced practice        | Predominantly autologous | p value                  |                                 |                          |                  |
| Immediate tissue expander                          | 151 (63.4%)        | 89 (42.8)                | <b>&lt;0.001</b>   |                          |              | 191 (49.0%)                            | 49 (65.3%)               | <b>&lt;0.001</b>   |                          |              | 110 (70.5%)                  | 70 (59.8%)               | 52 (48.1%)               | <b>0.001</b>             |                                 |                          |                  |
| Direct to implant                                  | 19 (8.0%)          | 20 (9.6%)                | 0.861              |                          |              | 32 (8.2%)                              | 7 (9.3%)                 | 0.548              |                          |              | 25 (16.0%)                   | 10 (8.5%)                | 4 (3.7%)                 | <b>0.004</b>             |                                 |                          |                  |
| Immediate autologous                               | 24 (10.1%)         | 40 (19.2%)               | 0.089              |                          |              | 52 (13.3%)                             | 12 (16.0%)               | 0.318              |                          |              | 7 (4.5%)                     | 15 (12.8%)               | 40 (37.0%)               | <b>&lt;0.001</b>         |                                 |                          |                  |
| Delayed reconstruction                             | 44 (18.5%)         | 58 (27.9%)               | 0.333              |                          |              | 83 (21.3%)                             | 19 (25.3%)               | 0.138              |                          |              | 29 (18.6%)                   | 37 (31.6%)               | 28 (25.9%)               | <b>0.044</b>             |                                 |                          |                  |
| No reconstruction                                  | 0 (0%)             | 1 (0.5%)                 | 1.000              |                          |              | 1 (0.3%)                               | 0 (0%)                   | 1.000              |                          |              | 0 (0%)                       | 1 (0.8%)                 | 0 (0%)                   | 0.853                    |                                 |                          |                  |

Data presented as N (%). α=0.05, bolded p-value indicates statistical significance
