# Supplementary material for: Breast Reconstruction Trends in the Setting of Postmastectomy Radiation Therapy: Analysis of Practices among Plastic Surgeons in the United States
Source: PubMed Central journal article supplement — Plast Reconstr Surg Glob Open. 2023 Feb 17;11(2):e4800. doi: 10.1097/GOX.0000000000004800 (PMC9937102; doi:10.1097/gox.0000000000004800), 2023-02-17
Supplement: gox-11-e4800-s003.pdf [file gox-11-e4800-s003.pdf]

Variations in concerns with preferences regarding the timing and technique in the setting of pre-operative and unknown post-operative radiation

|                                     | Pre-operative radiation - Technique |                      |                  |  | Unknown radiation - Timing |                        |         |
|-------------------------------------|-------------------------------------|----------------------|------------------|--|----------------------------|------------------------|---------|
|                                     | Implant-Based                       |                      |                  |  | Implant-Based              |                        |         |
| Concerns                            | Most prefer implant                 | Least prefer implant | p-value          |  | Most prefer immediate      | Least prefer immediate | p-value |
| Severe Capsular Contracture         | 72.6                                | 76.4                 | 0.544            |  | 76.9                       | 77.8                   | 0.859   |
| Mastectomy Skin loss                | 59.7                                | 53.3                 | 0.376            |  | 54.4                       | 50.4                   | 0.516   |
| Asymmetry                           | 50.0                                | 35.7                 | <b>0.044</b>     |  | 38.8                       | 39.3                   | 0.924   |
| Surgical site infection             | 40.3                                | 50.3                 | 0.172            |  | 48.1                       | 50.4                   | 0.705   |
| Wound Dehiscence                    | 69.4                                | 81.9                 | <b>0.034</b>     |  | 76.3                       | 78.6                   | 0.640   |
| Hematoma                            | 8.1                                 | 2.5                  | <b>0.047</b>     |  | 5.6                        | 3.4                    | 0.391   |
|                                     |                                     |                      |                  |  |                            |                        |         |
|                                     | Autologous                          |                      |                  |  | Autologous                 |                        |         |
| Concerns                            | Most prefer auto                    | Least prefer auto    | p-value          |  | Most prefer immediate      | Least prefer immediate | p-value |
| Mastectomy Skin loss                | 28.6                                | 51.4                 | <b>0.006</b>     |  | 33.1                       | 35.9                   | 0.631   |
| Asymmetry                           | 18.2                                | 16.2                 | 0.773            |  | 18.8                       | 16.2                   | 0.589   |
| Fat Necrosis                        | 17.7                                | 21.6                 | 0.571            |  | 16.3                       | 17.9                   | 0.710   |
| Total/Partial Flap Loss             | 24.5                                | 32.4                 | 0.310            |  | 25.6                       | 28.2                   | 0.632   |
| Surgical site infection             | 14.5                                | 35.1                 | <b>0.002</b>     |  | 20.6                       | 18.8                   | 0.707   |
| Wound Dehiscence                    | 53.6                                | 51.4                 | 0.797            |  | 52.5                       | 51.3                   | 0.841   |
| Hematoma                            | 0.9                                 | 5.4                  | 0.100            |  | 1.9                        | 0                      | 0.265   |
| Tissue Edema                        | 25.0                                | 13.5                 | 0.126            |  | 21.9                       | 20.5                   | 0.784   |
| Tissue Fibrosis                     | 42.3                                | 35.1                 | 0.415            |  | 44.4                       | 42.7                   | 0.786   |
| Donor Vessel Quality and Dissection | 47.3                                | 13.5                 | <b>&lt;0.001</b> |  | 35.0                       | 41.0                   | 0.306   |
| Poor Cosmetic Outcome               | 27.3                                | 24.3                 | 0.708            |  | 30.0                       | 27.4                   | 0.631   |

| Unknown radiation - Timing |                      |         |  | Unknown radiation - Timing    |                                |              |
|----------------------------|----------------------|---------|--|-------------------------------|--------------------------------|--------------|
| Implant-Based              |                      |         |  | Implant-Based                 |                                |              |
| Most prefer delayed        | Least prefer delayed | p-value |  | Most prefer delayed-immediate | Least prefer delayed-immediate | p-value      |
| 78.7                       | 76.5                 | 0.714   |  | 75.2                          | 75.0                           | 0.976        |
| 56.1                       | 53.1                 | 0.683   |  | 49.6                          | 55.7                           | 0.374        |
| 40.9                       | 47.5                 | 0.363   |  | 46.8                          | 36.4                           | 0.120        |
| 45.5                       | 43.8                 | 0.822   |  | 46.8                          | 48.9                           | 0.762        |
| 74.2                       | 73.5                 | 0.903   |  | 80.1                          | 83.0                           | 0.596        |
| 4.5                        | 5.6                  | 0.757   |  | 1.4                           | 1.1                            | 0.855        |
|                            |                      |         |  |                               |                                |              |
| Autologous                 |                      |         |  | Autologous                    |                                |              |
| Most prefer delayed        | Least prefer delayed | p-value |  | Most prefer delayed-immediate | Least prefer delayed-immediate | p-value      |
| 37.9                       | 33.3                 | 0.513   |  | 30.5                          | 28.4                           | 0.737        |
| 15.2                       | 23.5                 | 0.163   |  | 21.3                          | 14.8                           | 0.220        |
| 16.7                       | 22.8                 | 0.300   |  | 23.4                          | 13.6                           | 0.070        |
| 27.3                       | 27.8                 | 0.938   |  | 27.7                          | 22.7                           | 0.406        |
| 19.7                       | 18.5                 | 0.837   |  | 19.1                          | 23.9                           | 0.394        |
| 60.6                       | 53.7                 | 0.341   |  | 48.2                          | 51.1                           | 0.668        |
| 0                          | 2.5                  | 0.198   |  | 0.7                           | 0                              | 0.429        |
| 21.2                       | 16.7                 | 0.418   |  | 17.7                          | 26.1                           | 0.128        |
| 40.9                       | 37                   | 0.585   |  | 40.4                          | 51.1                           | 0.113        |
| 30.3                       | 40.1                 | 0.164   |  | 46.1                          | 31.8                           | <b>0.032</b> |
| 30.3                       | 24.1                 | 0.330   |  | 24.8                          | 36.4                           | 0.062        |

| Unknown radiation - Technique/Timing |                   |                      |                        |              |
|--------------------------------------|-------------------|----------------------|------------------------|--------------|
| Implant-Based                        |                   |                      |                        |              |
| Immediate tissue expander            | Direct to implant | Immediate autologous | Delayed reconstruction | p-value      |
| 75.8                                 | 66.7              | 79.7                 | 77.5                   | 0.311        |
| 44.2                                 | 61.5              | 56.3                 | 66.7                   | <b>0.013</b> |
| 45.4                                 | 38.5              | 43.8                 | 33.3                   | 0.058        |
| 51.7                                 | 53.8              | 42.2                 | 40.2                   | 0.159        |
| 79.6                                 | 74.4              | 75.0                 | 77.5                   | 0.800        |
| 3.3                                  | 5.1               | 3.1                  | 4.9                    | 0.862        |
|                                      |                   |                      |                        |              |
| Autologous                           |                   |                      |                        |              |
| Immediate tissue expander            | Direct to implant | Immediate autologous | Delayed reconstruction | p-value      |
| 32.1                                 | 41.0              | 29.7                 | 37.3                   | 0.612        |
| 20.8                                 | 17.9              | 23.4                 | 13.7                   | 0.370        |
| 16.7                                 | 23.1              | 23.4                 | 25.5                   | 0.242        |
| 29.2                                 | 17.9              | 18.8                 | 30.4                   | 0.172        |
| 18.3                                 | 33.3              | 6.3                  | 18.6                   | <b>0.036</b> |
| 50.0                                 | 64.1              | 46.9                 | 56.9                   | 0.232        |
| 0.4                                  | 2.6               | 1.6                  | 1.0                    | 0.539        |
| 20.4                                 | 25.6              | 20.3                 | 18.6                   | 0.836        |
| 42.9                                 | 35.9              | 54.7                 | 35.3                   | 0.080        |
| 41.7                                 | 25.6              | 43.8                 | 33.3                   | 0.131        |
| 27.5                                 | 12.8              | 31.3                 | 29.4                   | 0.181        |

Presented as the percentage of the given subgroup who reported each of the listed concerns as one of their 3 main concerns with either autologous (bottom) or implant-based (top) reconstruction in the setting of recent radiation.  $\alpha=0.05$ , bolded p-value indicates statistical significance
