# Supplementary material for: Breast Reconstruction Trends in the Setting of Postmastectomy Radiation Therapy: Analysis of Practices among Plastic Surgeons in the United States
Source: PubMed Central journal article supplement — Plast Reconstr Surg Glob Open. 2023 Feb 17;11(2):e4800. doi: 10.1097/GOX.0000000000004800 (PMC9937102; doi:10.1097/gox.0000000000004800), 2023-02-17
Supplement: gox-11-e4800-s004.pdf [file gox-11-e4800-s004.pdf]

**2020 - Timing of Post-Mastectomy Breast Reconstruction Following Radiation Therapy survey**

| ASPS Practice Type                                                | Survey Population |     |     | Survey Responders |     |     | Survey non responders |     |     |
|-------------------------------------------------------------------|-------------------|-----|-----|-------------------|-----|-----|-----------------------|-----|-----|
|                                                                   |                   |     |     |                   |     |     |                       |     |     |
| Academic                                                          | 702               | 15% | 24% | 79                | 17% | 26% | 620                   | 15% | 24% |
| Academic Practice (salaried with private practice)                | 401               | 9%  |     | 44                | 9%  |     | 347                   | 8%  |     |
| Employed Physician                                                | 280               | 6%  | 6%  | 32                | 7%  | 7%  | 245                   | 6%  | 6%  |
| Solo                                                              | 1543              | 34% | 40% | 100               | 22% | 27% | 1439                  | 35% | 42% |
| Solo practice-shared facility                                     | 290               | 6%  |     | 26                | 6%  |     | 268                   | 7%  |     |
| Large multi-specialty group practice (more than 20 physicians)    | 243               | 5%  | 29% | 51                | 11% | 38% | 201                   | 5%  | 28% |
| Large plastic surgery group practice (6 or more plastic surgeons) | 175               | 4%  |     | 31                | 7%  |     | 152                   | 4%  |     |
| Small plastic surgery group practice (2-5 plastic surgeons)       | 764               | 17% |     | 83                | 18% |     | 689                   | 17% |     |
| Medium multi-specialty group practice (6-20 physicians)           | 119               | 3%  |     | 12                | 3%  |     | 107                   | 3%  |     |
| Military                                                          | 35                | 1%  | 1%  | 7                 | 2%  | 2%  | 31                    | 1%  | 1%  |

| ASPS Practice Demographic         | Survey Population |     | Survey Responders |     | Survey non responders |     |
|-----------------------------------|-------------------|-----|-------------------|-----|-----------------------|-----|
| 50% Reconstructive & 50% Cosmetic | 935               | 21% | 148               | 33% | 787                   | 19% |
| 25% Reconstructive & 75% Cosmetic | 1157              | 25% | 63                | 14% | 1094                  | 27% |
| 75% Reconstructive & 25% Cosmetic | 1069              | 24% | 169               | 37% | 900                   | 22% |
| 100% Cosmetic                     | 831               | 18% | 20                | 4%  | 811                   | 20% |
| 100% Reconstructive               | 550               | 12% | 52                | 12% | 498                   | 12% |

| <b>ASPS Gender</b> | <b>Survey Population</b> |     | <b>Survey Responders</b> |     | <b>Survey non responders</b> |     |
|--------------------|--------------------------|-----|--------------------------|-----|------------------------------|-----|
| Female             | 907                      | 18% | 102                      | 22% | 805                          | 17% |
| Male               | 4175                     | 82% | 370                      | 78% | 3805                         | 83% |

| <b>ASPS Age</b> | <b>Survey Population</b> |     | <b>Survey Responders</b> |     | <b>Survey non responders</b> |     |
|-----------------|--------------------------|-----|--------------------------|-----|------------------------------|-----|
| Under 35        | 51                       | 1%  | 9                        | 2%  | 42                           | 1%  |
| 35 - 44         | 1613                     | 32% | 142                      | 30% | 1471                         | 32% |
| 45 - 54         | 1656                     | 33% | 164                      | 35% | 1492                         | 32% |
| 55 - 64         | 1294                     | 25% | 124                      | 26% | 1170                         | 25% |
| 65 and over     | 470                      | 9%  | 33                       | 7%  | 437                          | 9%  |

After analyzing the characteristics of non-responders, we believe that the sample is representative of the intended survey population. This survey topic specifically concerns breast reconstruction, and, notably, a higher percentage of surgeons who conduct 50% reconstruction and 75% reconstruction have responded compared to the overall population. Although this survey only has a 9% overall response rate, we feel that this is justified because the topic of this study is breast reconstruction, and a much higher percentage of surgeons who do significant reconstructive surgery have responded.
